# Supplementary material
Source: Elsevier journal article supplement (https://www.sciencedirect.com/science/article/pii/S1413867016305499)
Supplement: mmc1 [file S1413867016305499:mmc1.docx]

**Figure S1** – Cytokines and chemokines released by MDMs activated on classical pattern derived from uninfected (green circles), HIV-1+ treatment-naïve patients (blue squares) or HIV-1 under regular antiretroviral therapy (red triangles) after TLR4 or TLR2/Dec-1 stimuli. Plotted data are representative from median with interquartile range. **p<.05; **p<.01.*

**Figure S2** – Cytokines and chemokines released by MDMs activated on alternative pattern derived from uninfected (green circles), HIV-1+ treatment-naïve patients (blue squares) or HIV-1 under regular antiretroviral therapy (red triangles) after TLR4 or TLR2/Dec-1 stimuli. Plotted data are representative from median with interquartile range. **p<.05; **p<.01.*
